# Supplementary material for: Genome-Wide Identification of the NAC Gene Family in Zanthoxylum bungeanum and Their Transcriptional Responses to Drought Stress
Source: MDPI journal article supplement (doi:10.3390/ijms23094769), 2022-04-26
Supplement: s1 [file s1]

# Supplementary Figures

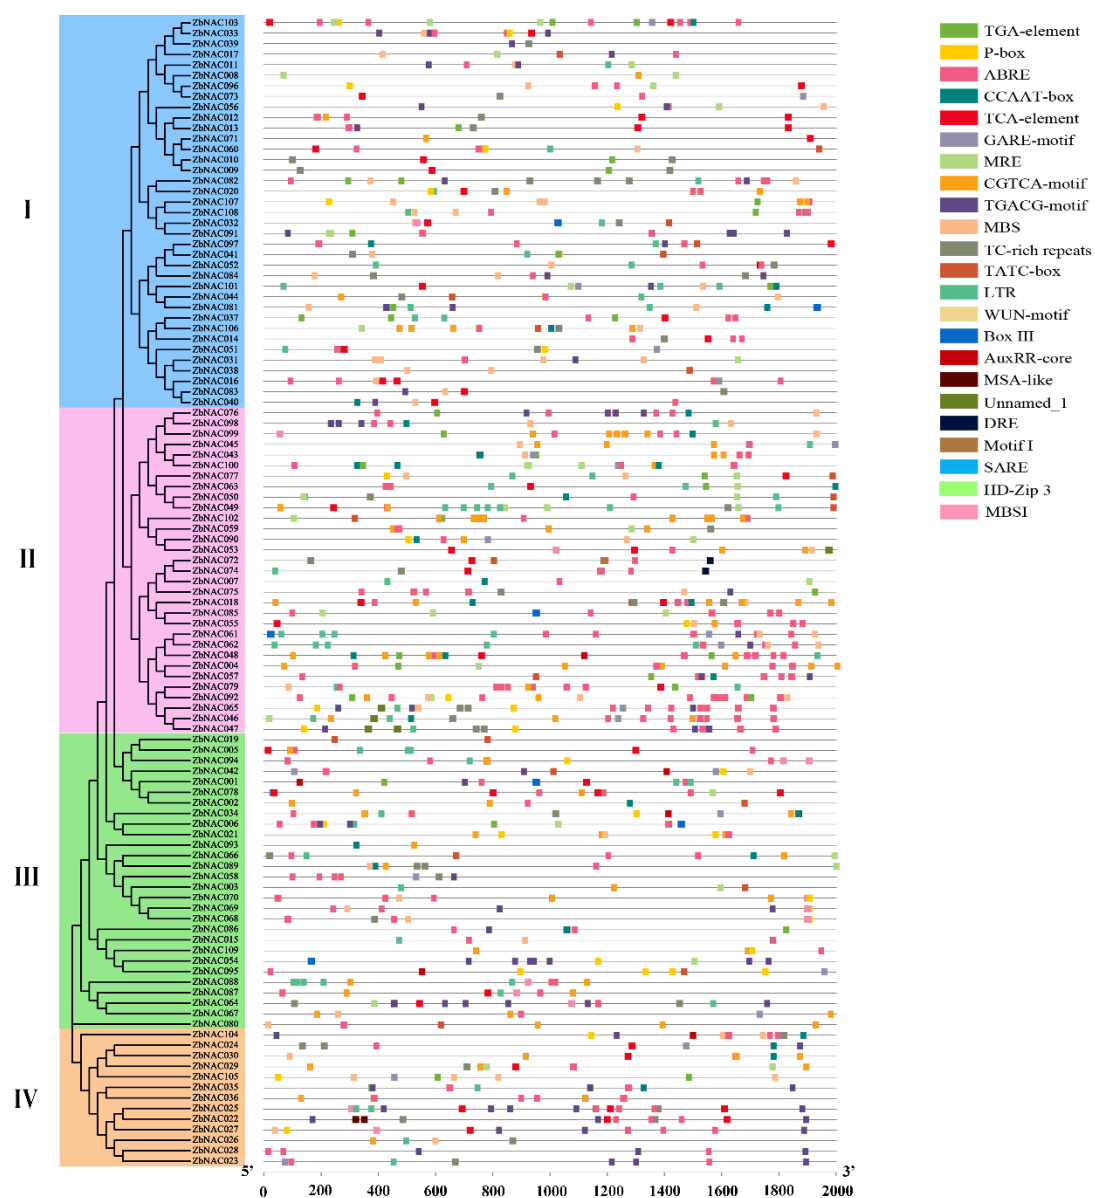

Figure S1. *cis*-element positions in *ZbNAC* promoters.

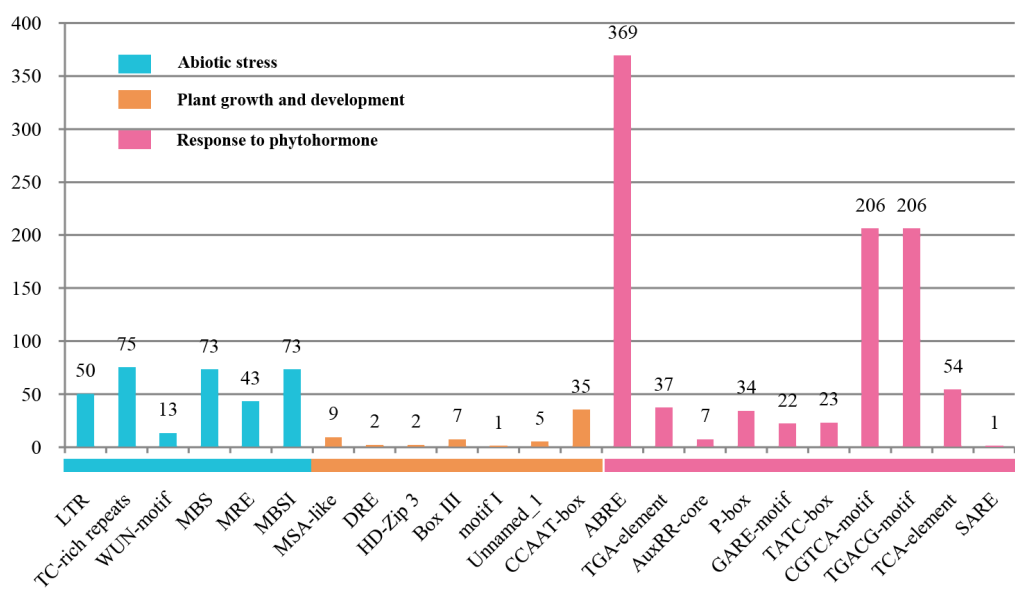

Figure S2. The total amount of each *cis*-element in the promoter regions of 108 *ZbNAC* genes.
